# Supplementary material for: Multiparametric magnetic resonance imaging in the assessment of anti-EGFRvIII chimeric antigen receptor T cell therapy in patients with recurrent glioblastoma
Source: PubMed Central journal article supplement (PMC6325110; doi:10.1038/s41416-018-0342-0), 2018-11-27
Supplement: 41416_2018_342_MOESM2_ESM.pdf [file 41416_2018_342_MOESM2_ESM.pdf]

**Table S1.** Characteristics for Patient with CAR-T therapy

|               | Pt  | Sex | Age (y) | Location        | Time from Initial Resection (d) | Line of Treatment | KPS | Steroid | OS from trial(d) | OS from diagnosis (d) | EGFRvIII Level (%) |
|---------------|-----|-----|---------|-----------------|---------------------------------|-------------------|-----|---------|------------------|-----------------------|--------------------|
| Early Surgery | 211 | F   | 56      | R Par           | 291                             | 3                 | 60  | 0       | 243              | 534                   | 42                 |
|               | 213 | F   | 52      | L Par           | 326                             | 3                 | 80  | DXM     | 284              | 616                   | 70                 |
|               | 216 | M   | 45      | L Tem           | 682                             | 3                 | 90  | 0       | 402              | 1025                  | 96                 |
|               | 217 | M   | 46      | L Tem           | 390                             | 4                 | 80  | 0       | 129              | 519                   | 80                 |
| Late Surgery  | 205 | F   | 65      | L Tem           | 676                             | 3                 | 100 | 0       | 251              | 927                   | 21                 |
|               | 207 | M   | 77      | L Tem,<br>L Occ | 462                             | 4                 | 80  | 0       | 186              | 646                   | 95                 |
|               | 209 | F   | 61      | L Tem,<br>L Occ | 227                             | 2                 | 100 | 0       | 1033             | 1261                  | 60                 |
| No Surgery    | 201 | M   | 59      | L BG            | 218                             | 4                 | 90  | DXM     | 146              | 369                   | 93                 |
|               | 202 | M   | 75      | L Tem           | 642                             | 4                 | 90  | 0       | 101              | 743                   | 6                  |
|               | 204 | F   | 54      | R Tha           | 179                             | 2                 | 70  | 0       | 284              | 454                   | 72                 |

Abbreviation:

y years; d days; KPS karnofsky performance status; OS overall survival;

R right; L left; Tem temporal; BG basal ganglia; Occ occipital; Tha: Thalamus;

Par: Parietal; DXM Dexamethasone
