# Supplementary material for: Multiparametric magnetic resonance imaging in the assessment of anti-EGFRvIII chimeric antigen receptor T cell therapy in patients with recurrent glioblastoma
Source: PubMed Central journal article supplement (PMC6325110; doi:10.1038/s41416-018-0342-0), 2018-11-27
Supplement: 41416_2018_342_MOESM3_ESM.pdf [file 41416_2018_342_MOESM3_ESM.pdf]

**Table S2.** Characteristics for Patient without CAR-T therapy

| Pt | Sex | Age (y) | Location | Time from Initial Resection (d) | OS from recurrence (d) | OS from diagnosis (d) | EGFRvIII |
|----|-----|---------|----------|---------------------------------|------------------------|-----------------------|----------|
| 1  | M   | 60      | R Tem    | 247                             | 352                    | 599                   | Neg      |
| 2  | M   | 45      | R Tem    | 421                             | 73                     | 494                   | Pos      |
| 3  | F   | 54      | L Par    | 216                             | 259                    | 475                   | Pos      |
| 4  | F   | 59      | R Tem    | 649                             | 334                    | 983                   | Pos      |
| 5  | F   | 55      | R Par    | 171                             | 366                    | 537                   | Pos      |
| 6  | M   | 61      | L Tem    | 459                             | 306                    | 765                   | Pos      |
| 7  | F   | 54      | L Fro    | 307                             | 329                    | 636                   | Pos      |
| 8  | F   | 63      | R Fro    | 705                             | 488                    | 1193                  | Pos      |
| 9  | M   | 77      | L Fro    | 1248                            | 227                    | 1475                  | Pos      |
| 10 | F   | 64      | L Tem    | 721                             | 318                    | 1039                  | Pos      |

Abbreviation:

y years; d days; OS overall survival; Neg negative; Pos positive

R right; L left; Tem temporal; Par Parietal; Fro Frontal
